# Supplementary material for: Allele-specific RNA-seq expression profiling of imprinted genes in mouse isogenic pluripotent states
Source: Epigenetics Chromatin. 2019 Feb 15;12:14. doi: 10.1186/s13072-019-0259-8 (PMC6376749; doi:10.1186/s13072-019-0259-8)
Supplement: Supplementary file 5 — Additional file 5: Table S4. Compiled list of imprinted genes. [file 13072_2019_259_MOESM5_ESM.xlsx]

## Sheet: Table S4
Table S4 Dirks et al.: Compiled list of imprinted genes.
Gene	Chromosome	Expression	Sufficient coverage to include in this study
AF313042	chr7	Maternal
AF357341	chr12	Maternal
AF357425	chr12	Maternal
AF357426	chr12	Maternal
AF357428	chr12	Maternal
Ampd3	chr7	Maternal
Apeg3	chr7	Paternal
Asb4	chr6	Maternal	Yes
Ascl2	chr7	Maternal
Atp10a	chr7	Maternal	Yes
Begain	chr12	Paternal
Blcap	chr2	Maternal
Calcr	chr6	Maternal
Cd81	chr7	Maternal
Cdkn1c	chr7	Maternal
Commd1	chr11	Maternal
Copg2	chr6	Maternal
D7Ertd715e	chr7	Paternal	Yes
Dcn	chr10	Maternal
Ddc	chr11	Paternal
Dhcr7	chr7	Maternal
Dio3	chr12	Paternal
Dlk1	chr12	Paternal
Gatm	chr2	Maternal
Gnas	chr2	Maternal
Gpr1	chr1	Paternal
Grb10	chr11	Maternal
H13	chr2	Maternal	Yes
H19	chr7	Maternal
Htr2a	chr14	Maternal
Igf2	chr7	Paternal
Igf2r	chr17	Maternal	Yes
Impact	chr18	Paternal
Ins2	chr7	Paternal
Kcnk9	chr15	Maternal
Kcnq1	chr7	Maternal
Kcnq1ot1	chr7	Paternal
Klf14	chr6	Maternal
Magel2	chr7	Paternal	Yes
MBII-343	chr12	Maternal
MBII-426	chr12	Maternal
Mcts2	chr2	Paternal	Yes
Meg3	chr12	Maternal	Yes
Mest	chr6	Paternal
Mir127	chr12	Maternal
Mir134	chr12	Maternal
Mir136	chr12	Maternal
Mir154	chr12	Maternal
Mir184	chr9	Paternal
Mir335	chr6	Paternal
Mir337	chr12	Maternal
Mir370	chr12	Maternal
Mir376b	chr12	Maternal
Mir380	chr12	Maternal
Mir410	chr12	Maternal
Mir411	chr12	Maternal
Mir431	chr12	Maternal
Mirg/ Meg9	chr12	Maternal
Mkrn1-ps1	chr5	Paternal
Mkrn3	chr7	Paternal	Yes
Nap1l4	chr7	Maternal
Nap1l5	chr6	Paternal
Ndn	chr7	Paternal	Yes
Nespas	chr2	Paternal
Nnat	chr2	Paternal
Peg10	chr6	Paternal	Yes
Peg12	chr7	Paternal	Yes
Peg13	chr15	Paternal
Peg3	chr7	Paternal
Phf17/ Jade1	chr3	Paternal	Yes
Phlda2	chr7	Maternal
Plagl1	chr10	Paternal	Yes
Ppp1r9a	chr6	Maternal
Rasgrf1	chr9	Paternal
Rhox5	chrX	Paternal
Rian	chr12	Maternal	Yes
Rtl1	chr12	Paternal
Sfmbt2	chr2	Paternal
Sgce	chr6	Paternal	Yes
Slc22a18	chr7	Maternal
Slc22a2	chr17	Maternal
Slc22a3	chr17	Maternal
Slc38a4	chr15	Paternal
Snrpn/ Snurf	chr7	Paternal	Yes
Tfpi2	chr6	Maternal
Tsix	chrX	Random
Th	chr7	Maternal
Tnfrsf23	chr7	Maternal
Tssc4	chr7	Maternal
Ube3a	chr7	Maternal	Yes
Usp29	chr7	Paternal
Xist	chrX	Random	Yes
Zdbf2	chr1	Paternal	Yes
Zfp264	chr7	Paternal
Zim1	chr7	Maternal
Zim2	chr7	Maternal
Zim3	chr7	Maternal
Zrsr1	chr11	Paternal
