# Supplementary material for: Allele-specific RNA-seq expression profiling of imprinted genes in mouse isogenic pluripotent states
Source: Epigenetics Chromatin. 2019 Feb 15;12:14. doi: 10.1186/s13072-019-0259-8 (PMC6376749; doi:10.1186/s13072-019-0259-8)
Supplement: Supplementary file 6 — Additional file 6: Table S5. Allelic bias in expression of known imprinted genes shown as percentage of B6 as compared to the total coverage of B6 and DBA2 per gene. The table below includes gene expression values, read counts, allelic counts and standard error of the mean of the imprinted genes. For the upper part, the table only includes data points of genes for which we obtained sufficient coverage to calculate allelic bias, explaining the empty cells in the table. [file 13072_2019_259_MOESM6_ESM.xlsx]

## Sheet: Table S5
Table S5 Dirks et al.: Allelic bias in expression of known imprinted genes shown as percentage of B6 as compared to the total coverage of B6 and DBA2 per gene. The table below includes gene expression values, read counts, allelic counts and standard error of the mean of the imprinted genes. For the upper part, the table only includes datapoints of genes for which we obtained sufficient coverage t…
									%B6 (Maternal)
Gene ID	Gene name	chr	strand	start	end	length	exons	Imprinted expression	ESC1	ESC2	ESC-NT1	ESC-NT2	ESC-NT3	ESC-PGA1	ESC-PGA2	ESC-PGA3	EpiSC1	EpiSC2	EpiSC3	EpiSC-NT1	EpiSC-NT2	EpiSC-NT3	EpiSC-PGA1	EpiSC-PGA2	EBI1	EBI2	EBI3	ERSE1	ERSE2	APE1	APE2	EB-TE1	EB-TE2
NM_001082962	Snrpn/Snurf	chr7	-	67127388	67285105	2076	11	Paternal	51.0304	48.6815	10.2151	9.46215	34.1554	56.5769	53.7211		0.0825083	0.0965251	0.189394	0.0823045	0.320171	0.556586		94.5946	0.0995859	0.226055	0.12994	0.127194	0.199109	0.120656	0.14148	0.167655	0.150237
NR_015456	D7Ertd715e	chr7	-	67114463	67119317	2193	3	Paternal	71.4286	42.8571	0	0	25.9259	41.6667	50		0	0.10989	0.0552486	0.119546	0.146951	0.121286		85.8586	0			0.0973078	0.032812	0.13766	0.0720165	0.188857	0
NM_011668	Ube3a	chr7	+	66484122	66562097	5097	13	Maternal	72.7273		44.1176		53.8462	63.6364	65		65.8333	55.0725	51.7588	57.2115	53.5714	54.6099		54.6392	56.2701			60.166	32.1743	43.4717		64.9855	52.7778
NM_009728	Atp10a	chr7	+	65913572	66084796	5469	21	Maternal				85.7143	66.6667	80	70.5882					81.8182	67.8571	71.4286							100
NM_010882	Ndn	chr7	+	69493163	69494814	1652	1	Paternal							70			0		0	0	0						0	0	0
NM_013779	Magel2	chr7	+	69521865	69526526	4662	1	Paternal									0	0	0	0	0	0						0	0.13947	0
NM_011746	Mkrn3	chr7	-	69562479	69565025	2547	1	Paternal	50	76.9231			42.8571				0	0	0	0	0	0								0
NM_013788	Peg12	chr7	-	69606757	69609396	2640	1	Paternal		57.8947		45.4545		43.75	61.5385						0	0
NR_028261	Rian	chr12	+	110842155	110899926	3584	21	Maternal	67.1875	68.1818	100		78.2609		56.25	52.2267	94.7421	99.9153	98.6118		99.7435		60.2697	64.6447		100	100	92.8635	99.7522	100	99.9436		100
NR_003633	Meg3	chr12	+	110783608	110806810	11422	5	Maternal	50.7463	43.1818	98.5075	36.4286	52	44.7257	20.979	34	92.7739	99.6485	96.6942		99.1446		53.0454	58.6207		99.841	100	95.8533	99.4078	98.6264	100
NM_010515	Igf2r	chr17	-	12875272	12962572	8929	48	Maternal	100	100	100	100	100				100	100		100	100	100				94.7368		100	99.0826
NM_025543	Mcts2	chr2	+	152512884	152513682	799	1	Paternal												93.3333		97.7273			0.192678		0	21.03	0.54816	5.76541	0.331675	0	0
NM_001159551	H13	chr2	+	152495197	152534404	5402	13	Maternal	20.6897	40	40	40	60	41.3043	28.2609	39.5062	77.4059	86.7568	86.6359	63.9535	87.9781	48.8889			100		78.3467	78.5429	87.2541	90.4635	99.686	66.7063	98.5159
NM_023048	Asb4	chr6	+	5333386	5383022	3286	6	Maternal									50	62.4615	50	50.165	54.1935	50.7092						100		89.5846
NM_001040611	Peg10	chr6	+	4697306	4710517	6667	2	Paternal	20			28.8462	27.5862				0	0	0	0	0	0
NM_001130188	Sgce	chr6	-	4624350	4697204	1804	12	Paternal				51.7241	30.7692				0	0		0	0	0						0	0.591716	0.787402
NM_028673	Zdbf2	chr1	+	63349212	63361149	11938	1	Paternal	33.3333	41.6667	31.0345				61.1111	54.8387	4.82315	1.81818	1.30719	46.0981		14.4578	8.82353	48.8372	0.13624			0			0
NM_009538	Plagl1	chr10	+	12810594	12851500	5260	6	Paternal	75.7143	82.6923	93.3333	75.7576	94.8718	76.1905			0.481348	0.377834	0.888889	0.15361	2.56293	2.23176
NM_172303	Phf17 (Jade1)	chr3	+	41367305	41420786	5576	11	Paternal	52.5701	51.5625	53.6388	50.5618	48.3333		57.4879		64.7887	53.3058	55.2448	52.5424	43.3333	52.2388	52.7027	59.6154	0.11294	1.87041	0	33.1256				0.75703	34.8389
NR_001463	Xist	chrX	-	100655712	100678572	17918	7	Random									100		100	99.8826	99.8639	59.7222	100	1.79257	0.197628	0.0791766		18.7625	51.6259	30.6122		0
									RPKM																									Read count
Gene ID	Gene name	chr	strand	start	end	length	exons	Imprinted expression	ESC1	ESC2	ESC-NT1	ESC-NT2	ESC-NT3	ESC-PGA1	ESC-PGA2	ESC-PGA3	EpiSC1	EpiSC2	EpiSC3	EpiSC-NT1	EpiSC-NT2	EpiSC-NT3	EpiSC-PGA1	EpiSC-PGA2	EBI1	EBI2	EBI3	ERSE1	ERSE2	APE1	APE2	EB-TE1	EB-TE2	ESC1	ESC2	ESC-NT1	ESC-NT2	ESC-NT3	ESC-PGA1	ESC-PGA2	ESC-PGA3	EpiSC1	EpiSC2	EpiSC3	EpiSC-NT1	EpiSC-NT2	EpiSC-NT3	EpiSC-PGA1	EpiSC-PGA2
NM_001082962	Snrpn/Snurf	chr7	-	67127388	67285105	2076	11	Paternal	191.04	165.125	87.9968	124.072	87.1336	151.196	117.822	57.5015	146.563	145.311	158.321	130.942	107.609	126.527	25.2687	3.10248	298.437	354.044	484.615	926.177	778.478	949.666	779.478	340.194	269.858	3646	2660	526	2477	1847	3655	2076	1890	14994	22452	18683	15786	4739	4734	3148	386
NR_015456	D7Ertd715e	chr7	-	67114463	67119317	2193	3	Paternal	1.48805	1.46913	20.588	0.71126	3.88532	3.75936	1.55806	0.37441	109.624	106.937	133.734	118.86	96.7737	159.222	18.2899	5.78262	2.99697	0	0	26.1211	52.5513	50.1976	62.5216	5.13613	0.21765	30	25	130	15	87	96	29	13	11847	17454	16671	15137	4502	6293	2407	760
NM_011668	Ube3a	chr7	+	66484122	66562097	5097	13	Maternal	1.53657	1.4159	16.2852	1.57091	2.3634	2.32512	2.35782	2.09419	27.0367	35.608	29.1926	34.2003	17.1099	19.7472	33.7298	34.0855	16.1735	1.63344	20.1048	19.3285	26.9115	33.3633	17.1435	18.2815	4.40133	72	56	239	77	123	138	102	169	6791	13508	8458	10123	1850	1814	10317	10412
NM_009728	Atp10a	chr7	+	65913572	66084796	5469	21	Maternal	2.90389	2.75701	5.01681	4.04993	2.63242	4.71079	3.6624	4.13447	2.53424	2.02437	2.43826	2.81806	2.96511	3.80458	3.96105	2.70928	0	0	0	0.03734	1.27978	0.04728	0.01351	0	0	146	117	79	213	147	300	170	358	683	824	758	895	344	375	1300	888
NM_010882	Ndn	chr7	+	69493163	69494814	1652	1	Paternal	11.1279	10.3753	4.6251	7.49053	7.29191	10.8647	13.0517	10.4375	21.0909	22.3988	28.9547	20.243	67.771	23.0744	3.58091	0.94944	0	0	0	24.8281	1.05359	36.1538	7.61694	0	0.26829	169	133	22	119	123	209	183	273	1717	2754	2719	1942	2375	687	355	94
NM_013779	Magel2	chr7	+	69521865	69526526	4662	1	Paternal	0.51332	0.52522	1.41544	0.8922	0.35713	0.62631	0.78346	0.46063	4.85766	3.54202	6.7282	3.44254	9.43408	4.26083	0.67199	0.04295	0	0	0	6.85907	1.01676	0.82864	0.00528	0	0.0128	22	19	19	40	17	34	31	34	1116	1229	1783	932	933	358	188	12
NM_011746	Mkrn3	chr7	-	69562479	69565025	2547	1	Paternal	2.86141	4.19961	2.5908	2.00052	5.57552	3.81005	3.33064	2.15742	3.48167	2.89611	3.81267	3.2182	6.27424	5.29372	0.56266	0.18998	0	0	0	0	0	3.85153	0.0145	0	0	67	83	19	49	145	113	72	87	437	549	552	476	339	243	86	29
NM_013788	Peg12	chr7	-	69606757	69609396	2640	1	Paternal	4.61475	5.22324	2.76264	2.99354	3.07908	3.77342	4.95386	3.58866	1.1991	1.41486	1.39271	1.61112	3.89263	4.26654	0.15149	0.2781	0	0	0	0.40736	0.02338	0	3.91289	0	0.03551	112	107	21	76	83	116	111	150	156	278	209	247	218	203	24	44
NR_028261	Rian	chr12	+	110842155	110899926	3584	21	Maternal	18.2407	17.3676	14.3418	31.045	6.25768	31.2457	19.3958	37.9597	162.328	139.976	170.925	0.31711	176.368	0.10837	311.666	204.886	0	0.45227	4.60365	10.7567	13.0812	12.8454	17.0256	0.07168	0.14507	601	483	148	1070	229	1304	590	2154	28670	37338	34822	66	13409	7	67032	44008
NR_003633	Meg3	chr12	+	110783608	110806810	11422	5	Maternal	15.0851	22.9041	7.51041	21.3581	9.20891	26.3528	22.9103	35.3846	28.9908	29.4153	19.1632	0.03618	204.107	0.01943	67.2593	40.5577	0	1.78196	1.71315	4.72916	4.81899	2.6538	3.60573	0.0865	0.0097	1584	2030	247	2346	1074	3505	2221	6399	16318	25006	12442	24	49455	4	46102	27763
NM_010515	Igf2r	chr17	-	12875272	12962572	8929	48	Maternal	23.4511	20.9134	15.6751	15.0814	27.8049	23.2463	21.8515	24.0998	21.1606	23.1283	14.4477	33.6167	44.9491	24.956	18.7167	25.4708	15.7463	36.2284	24.3224	3.18486	3.46034	2.49879	1.57748	16.3502	14.5477	1925	1449	403	1295	2535	2417	1656	3407	9311	15370	7333	17431	8514	4016	10029	13630
NM_025543	Mcts2	chr2	+	152512884	152513682	799	1	Paternal	12.7972	13.7098	9.56279	14.8366	14.4638	13.4352	9.73244	10.8298	25.4481	22.0963	26.2672	36.854	21.5936	52.2221	5.21396	3.06987	32.3075	0.76076	47.7855	57.2122	102.337	113.716	80.3614	11.8217	31.416	94	85	22	114	118	125	66	137	1002	1314	1193	1710	366	752	250	147
NM_001159551	H13	chr2	+	152495197	152534404	5402	13	Maternal	6.34294	5.12913	3.98608	8.54681	4.51431	5.65948	9.31318	8.86256	15.2438	15.1448	12.6193	4.52019	14.9309	6.33744	18.3913	19.4689	0.79024	23.2989	28.4902	9.31895	10.4566	16.2086	6.163	7.71109	11.1867	315	215	62	444	249	356	427	758	4058	6089	3875	1418	1711	617	5962	6303
NM_023048	Asb4	chr6	+	5333386	5383022	3286	6	Maternal	0.13241	0.11766	0.42277	0.03165	0.20863	0	0.07171	0.11533	12.7337	13.6936	13.0897	15.9309	7.23025	15.8049	8.91003	17.6964	0	0	0	1.68609	0	10.5899	0.81682	0	0	4	3	4	1	7	0	2	6	2062	3349	2445	3040	504	936	1757	3485
NM_001040611	Peg10	chr6	+	4697306	4710517	6667	2	Paternal	163.352	98.6211	148.308	269.207	91.5909	141.266	92.4264	101.955	39.9701	48.6818	39.8443	50.6839	35.3462	61.8277	6.71602	6.7099	0	0	0.00682	0	0.42585	0.46309	0.00185	0.00741	0.1662	10012	5102	2847	17260	6235	10967	5230	10762	13132	24156	15100	19623	4999	7429	2687	2681
NM_001130188	Sgce	chr6	-	4624350	4697204	1804	12	Paternal	5.84884	8.35813	3.65785	10.2026	13.6808	8.80676	3.20025	5.18167	17.0079	11.3208	15.2225	19.5587	18.1087	16.4244	2.52174	0.46247	0	0	0	3.1316	1.73119	5.7835	0	0.00548	0.04725	97	117	19	177	252	185	49	148	1512	1520	1561	2049	693	534	273	50
NM_028673	Zdbf2	chr1	+	63349212	63361149	11938	1	Paternal	5.36684	4.2101	7.79672	5.25245	3.70811	4.66868	4.66825	6.31709	12.9917	20.2734	18.1212	40.0037	0.13821	11.7683	3.19374	1.74015	8.19834	5.78291	1.49442	2.07422	0.78586	0.87906	4.31725	0.46596	0.00785	589	390	268	603	452	649	473	1194	7643	18013	12297	27733	35	2532	2288	1245
NM_009538	Plagl1	chr10	+	12810594	12851500	5260	6	Paternal	2.52295	1.71503	0.99041	2.94562	1.07991	2.12245	1.25437	0.94861	22.8618	30.3435	5.92315	17.8912	42.2468	27.5637	3.45632	1.58611	0	0	0	0.0207	0.10795	0	0	0.07326	0	122	70	15	149	58	130	56	79	5926	11879	1771	5465	4714	2613	1091	500
NM_172303	Phf17 (Jade1)	chr3	+	41367305	41420786	5576	11	Paternal	58.4849	39.7064	71.5036	61.3549	38.9745	43.4009	49.8248	54.1779	13.4507	11.9831	13.4749	12.6031	6.92391	9.09509	14.8887	16.2819	44.1457	57.6073	14.7992	20.1363	6.94912	9.72661	10.1705	18.2261	44.5674	2998	1718	1148	3290	2219	2818	2358	4783	3696	4973	4271	4081	819	914	4982	5441
NR_001463	Xist	chrX	-	100655712	100678572	17918	7	Random	1.77874	1.93474	0.25198	0.41205	1.47578	2.79421	1.60445	2.53445	44.8591	0.06899	1.35294	74.3881	123.52	75.0414	41.5126	83.9026	5.18064	13.1017	3.89769	4.28949	10.1747	0.42186	11.0088	0.79183	4.75641	293	269	13	71	270	583	244	719	39610	92	1378	77403	46950	24233	44637	90098
[truncated: 84 more columns]
